# Supplementary material for: Towards biodegradable elastomers: green synthesis of carbohydrate functionalized styrene–butadiene–styrenecopolymer by click chemistry
Source: Royal Society of Chemistry journal article supplement (doi:10.1039/c1gc16146f), 2011-12-23
Supplement: c1gc16146f.pdf [file c1gc16146f.pdf]

## Towards biodegradable elastomers : green synthesis of carbohydrate functionalized styrene-butadiene-styrene copolymer by click chemistry

### Electronic Supplementary Information

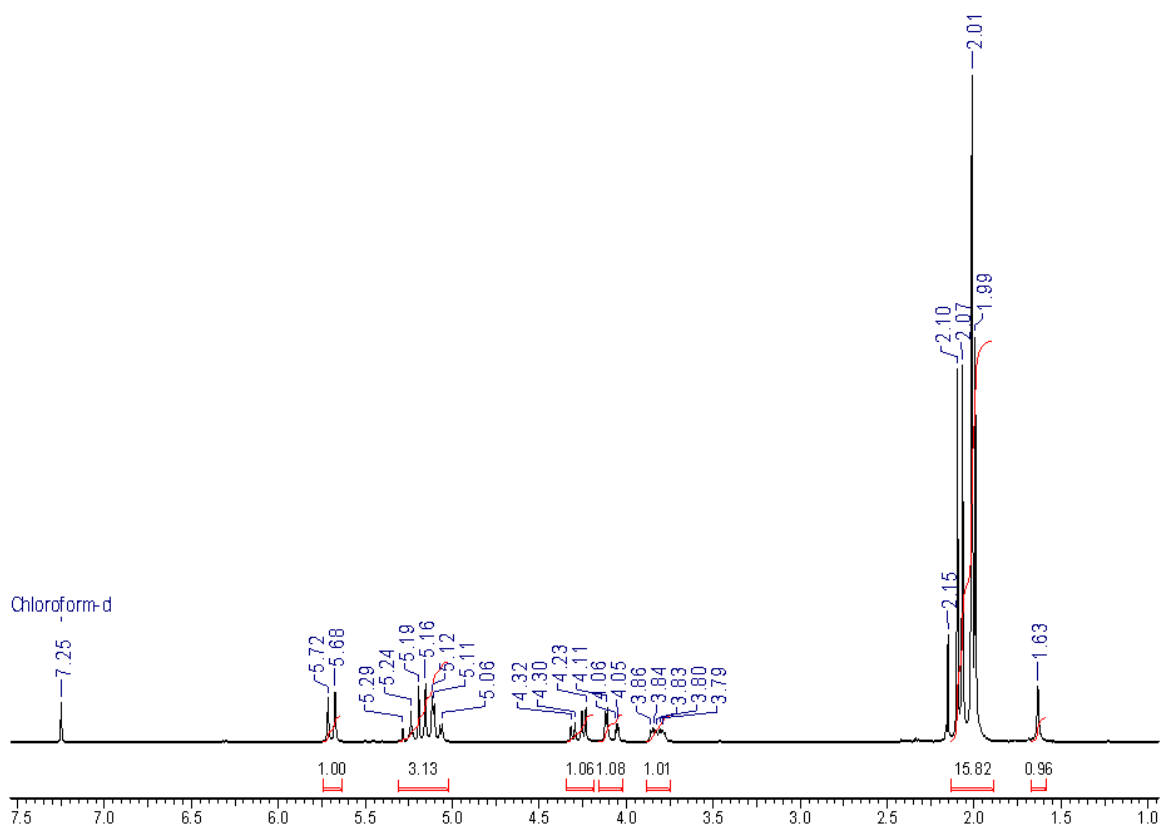

Supplementary Data Fig. (i)

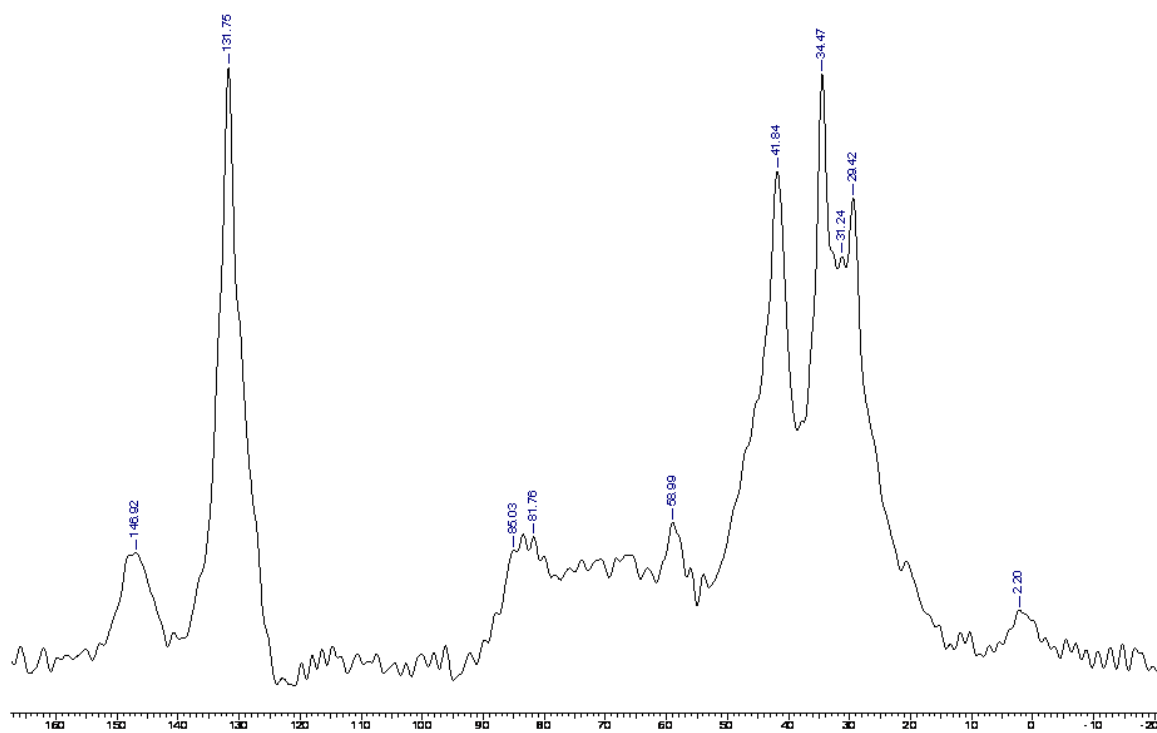

Supplementary Data Fig. (ii)
